# Supplementary material for: Anti-Herpes Simplex Virus Efficacy of Silk Cocoon, Silkworm Pupa and Non-Sericin Extracts
Source: MDPI journal article supplement (doi:10.3390/antibiotics10121553), 2021-12-19
Supplement: s1 [file s1]

## Supplementary Materials

Additional Supplementary Materials may be found in the online version of this article:

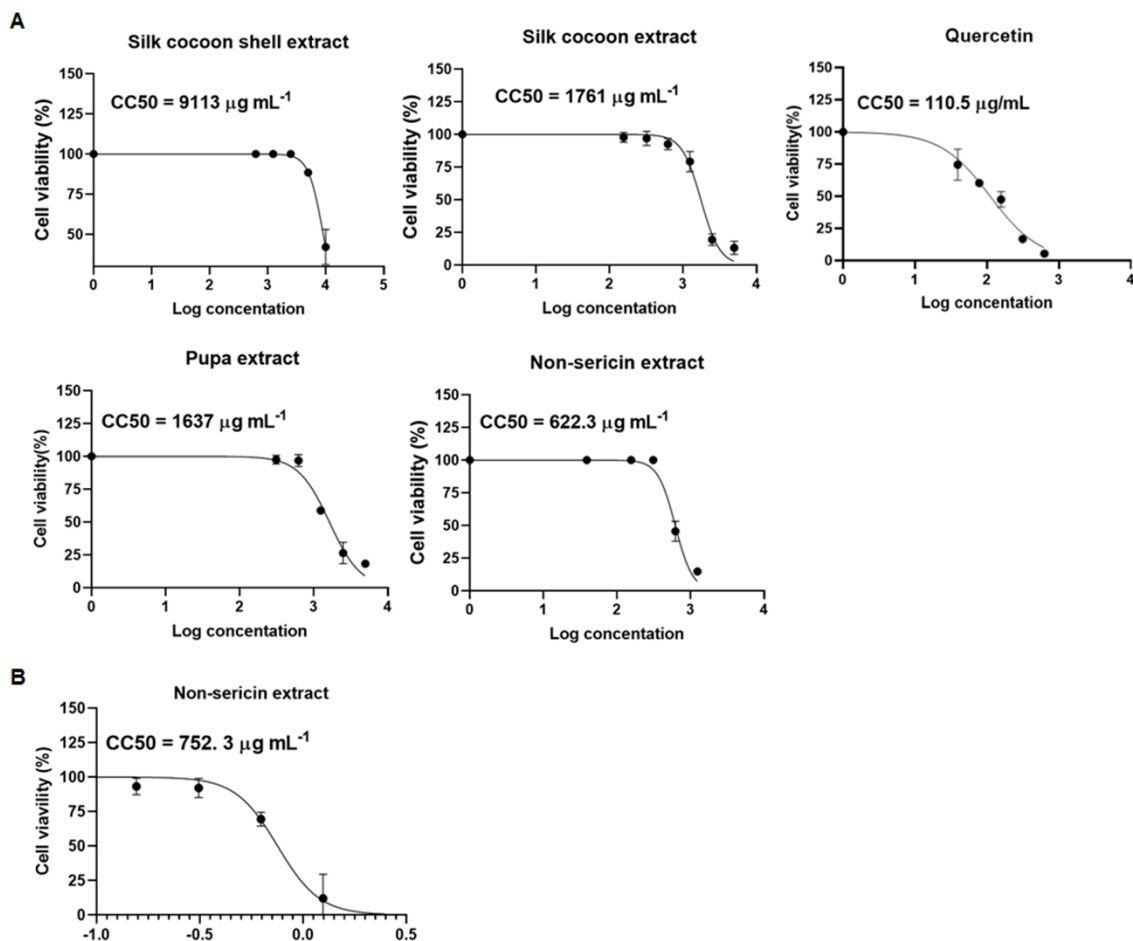

**Figure S1:** The 50% cytotoxic concentration (CC50) of extracts after treatment on Vero cells (A) with the concentration of silk cocoon shell extract ranging from 625-10,000 µg/mL, silk cocoon extract (156.25 -5,000 µg/mL), silkworm pupa extract (312.50 – 5,000 µg/mL), non-sericin extract (39.06 - 1,250 µg/mL) and quercetin 39.06-625.00 µg/mL. In addition, CC50 of non-sericin extract was evaluated on HeLa cell (B) with concentration ranging from 78.12 -2,500 µg/mL.

**Table S1.** List of primers used to amplify cDNA transcripts levels from HSV-2 infected and non-sericin treated HeLa cell.

| Target genes                  | Forward (5'→3')       | Reverse (5'→3')       |
|-------------------------------|-----------------------|-----------------------|
| <i>GAPDH</i>                  | CGACCACTTTGTCAAGCTCA  | AGGGGTCTAGGCAACTG     |
| <i>TNF<math>\alpha</math></i> | TGCTTGTTTCCTCAGCCTCTT | ATGGGCTACAGGCTTGTCACT |
| <i>IL8</i>                    | TCCTGATTTCTGCAGCTCTGT | CCAGACAGAGCTCTCTTCCA  |
| <i>IL6</i>                    | GATCATCCTCGACGGCATC   | AGCCACTGGTTCTGTGCCT   |
| <i>IP10</i>                   | GAATCGAAGGCCATCAAGAA  | AAGCAGGGTCAGAACATCCA  |
| <i>COX-2</i>                  | GCAGTTGTTCCAGACAAGCA  | GAAAGGTGTCAGGCAGAAGG  |
